# Supplementary material
Source: PubMed Central journal article supplement (PMC6497994)
Supplement: MCB.00489-18-s0001.pdf [file MCB.00489-18-s0001.pdf]

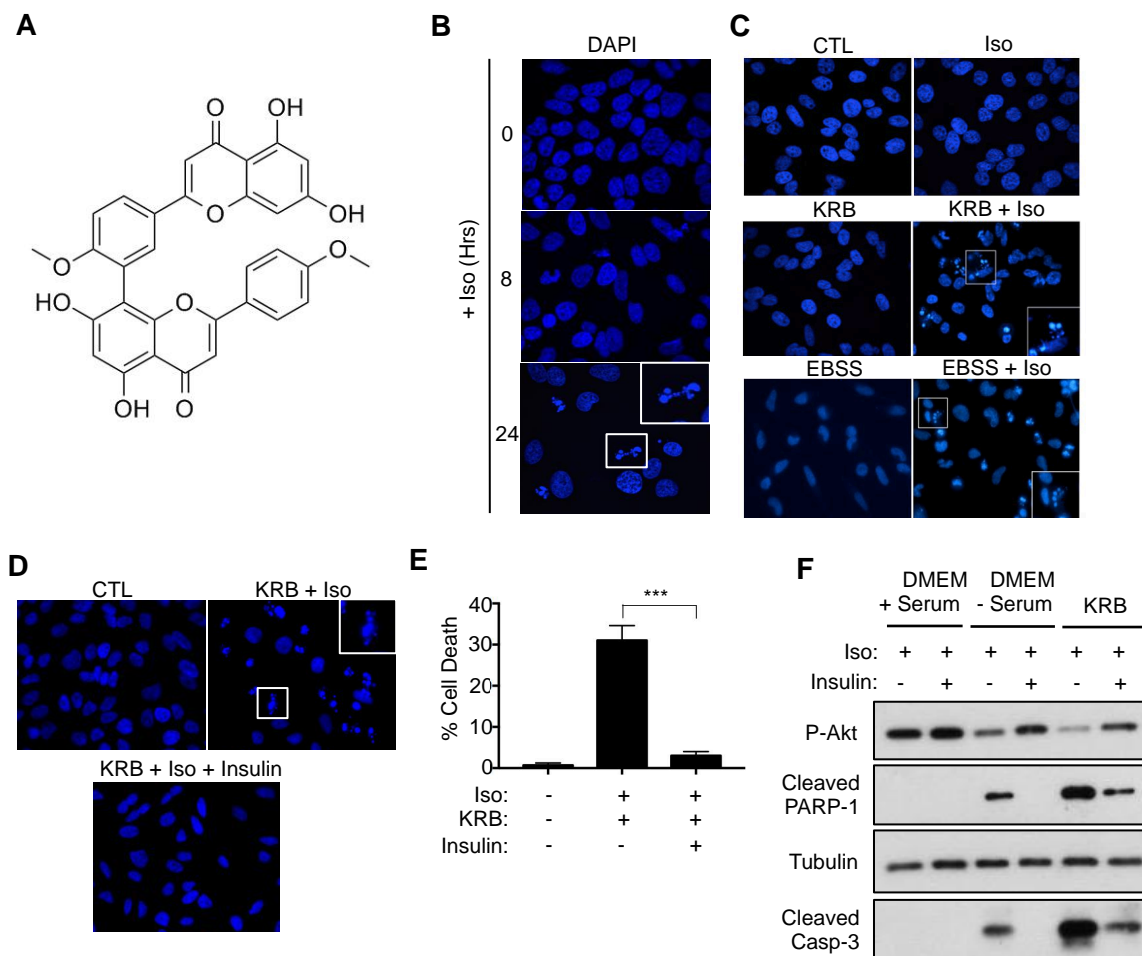

**Figure S1: Growth factors and amino acid withdrawal sensitize cells to apoptosis via isoginkgetin.** (A) Chemical structure of isoginkgetin. (B) DAPI stain of HeLa cells treated with 10  $\mu$ M isoginkgetin for 0, 8 or 24 h. (C) DAPI stain of HeLa cells treated with 10  $\mu$ M isoginkgetin either alone or in combination with KRB or EBSS for 6 h. (D-E) DAPI stain (D) and quantification (E) of HeLa cells treated with KRB and isoginkgetin, with or without insulin (5  $\mu$ g/mL) ( $n=3$ , approximately 200 cells per condition,  $***p<0.001$ ). (F) Western blot analysis of tubulin, cleaved PARP-1, phospho-AKT and caspase-3 in cells treated with isoginkgetin in either complete DMEM, serum-free DMEM or KRB.

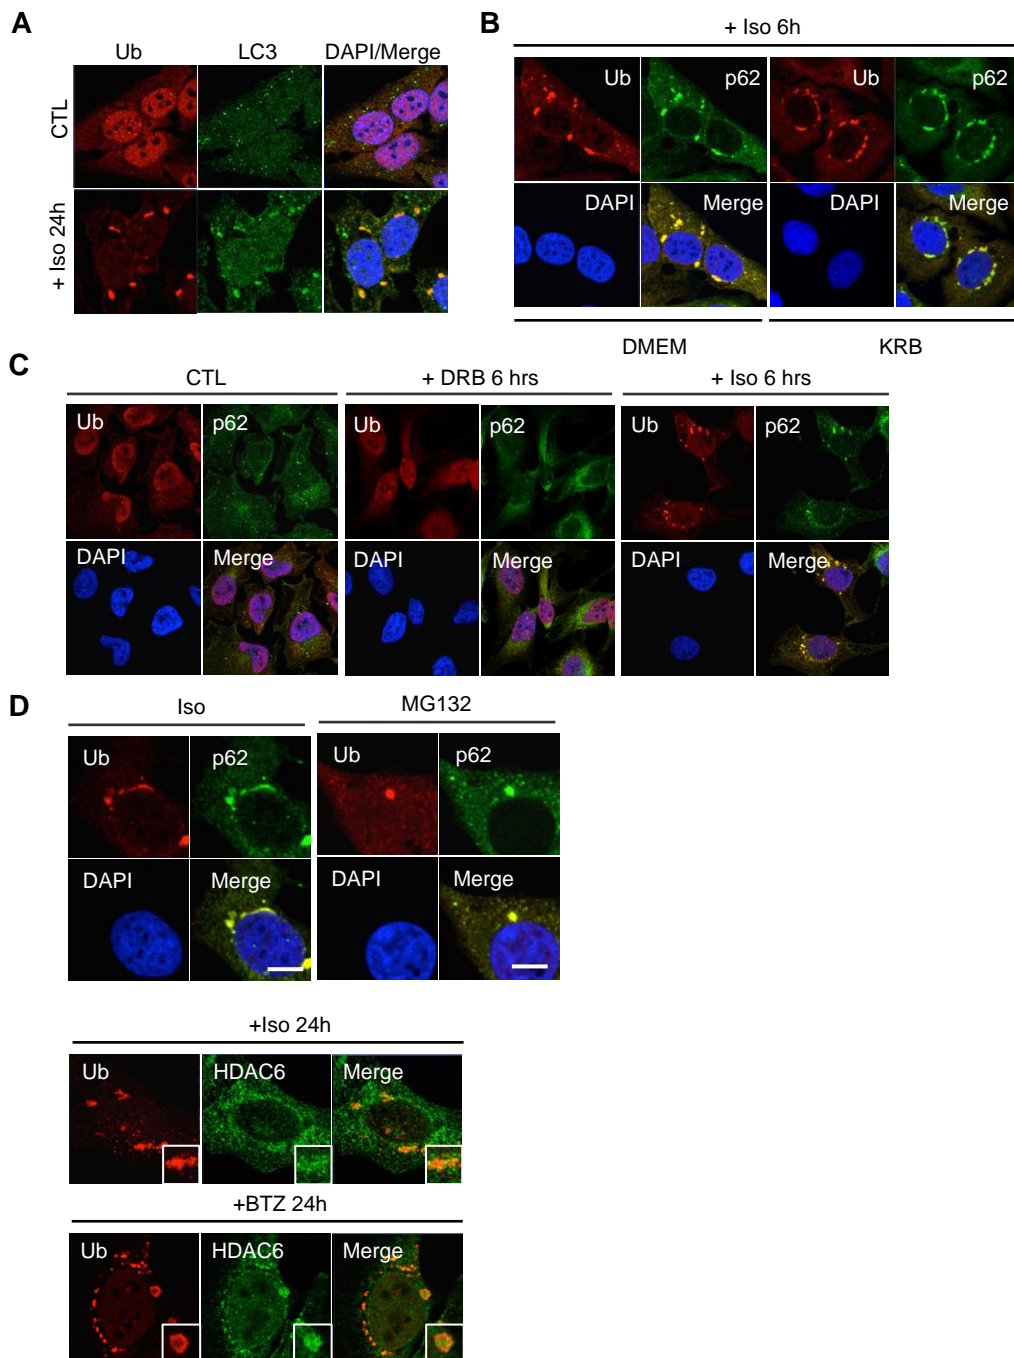

**Figure S2: Isoginkgetin induces formation of perinuclear aggregates of ubiquitinated protein cargo that are distinct from previously reported aggresome.** (A) Confocal immunofluorescence microscopy analysis of HeLa cells treated with 10  $\mu$ M isoginkgetin for 24 h, stained with LC3, ubiquitin (Ub), and DAPI nuclear stain. (B) Confocal immunofluorescence microscopy analysis of HeLa cells treated with 10  $\mu$ M isoginkgetin for 6 h in either nutrient-rich DMEM or KRB, stained with p62, Ub or nuclear stain DAPI. (C) Confocal immunofluorescence microscopy analysis of HeLa cells treated with 10  $\mu$ M isoginkgetin or 10  $\mu$ M 5,6-dichlorobenzimidazole 1- $\beta$ -D-ribofuranoside (DRB) for 6 h and stained with Ub, p62 antibodies, and DAPI nuclear stain. (D) Confocal immunofluorescence analysis of HeLa cells stained for p62, ubiquitin, HDAC6 and DAPI upon 24-h treatment with 10  $\mu$ M isoginkgetin or 10  $\mu$ M MG132 (scale bar = 10  $\mu$ M).

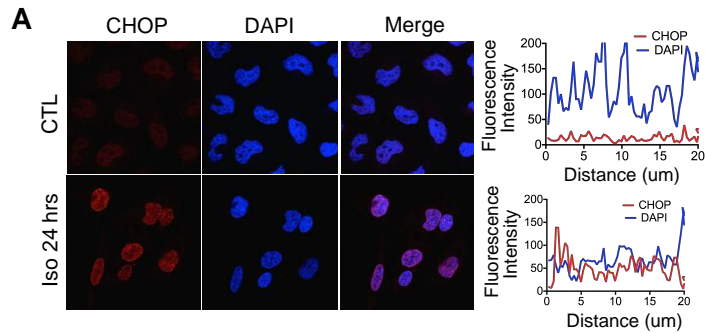

**Figure S3: Isoginkgetin induces ER stress in HeLa cells.** (A) Confocal microscopy analysis of HeLa cells stimulated with 10 μM isoginkgetin for 24 h, stained with CHOP and DAPI nuclear stain.

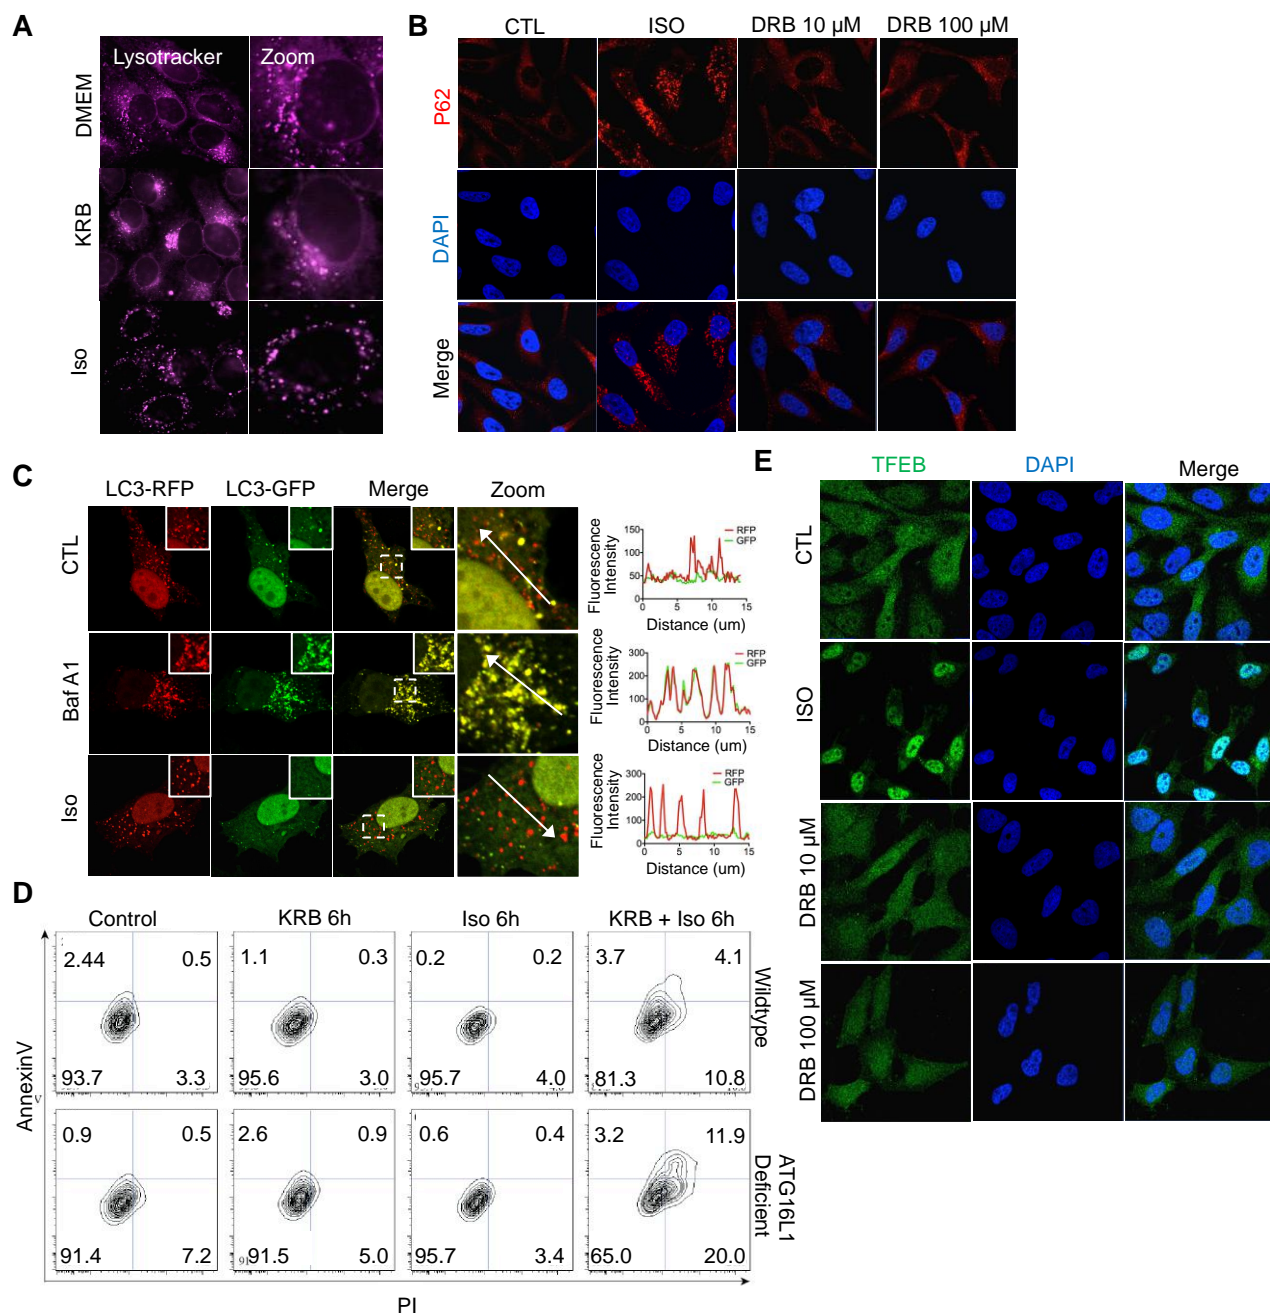

**Fig S4. Autophagy activation and lysosomal repositioning occur in response to treatment with isoginkgetin.** (A) HeLa cells stained with Lysotracker-DND 99 for 1 h following treatment with isoginkgetin or KRB for 6 h, visualized by immunofluorescence. (B) HeLa cells treated with isoginkgetin (10  $\mu$ M) or DRB (10  $\mu$ M or 100  $\mu$ M) for 6h stained with a p62 antibody and DAPI nuclear stain. (C) Confocal immunofluorescence analysis of HeLa cells stimulated with either 1  $\mu$ M bafilomycin A1 or 10  $\mu$ M isoginkgetin for 6 h, followed by staining with LAMP2 and LC3 antibodies and DAPI nuclear stain. Co-localization plots show the fluorescence intensity over the distance indicated by the white arrow. Scale bar= 5  $\mu$ m. (D) Wildtype and CRISPR-generated ATG16L1 knockout HCT 116 cells lines were stimulated with KRB or 10  $\mu$ M isoginkgetin for 6 h, followed by staining with AnnexinV-FITC and propidium iodide and analyzed via flow cytometry. (E) HeLa cells treated with isoginkgetin (10  $\mu$ M) or DRB (10  $\mu$ M or 100  $\mu$ M) for 6h stained with a TFEB antibody and DAPI nuclear stain.

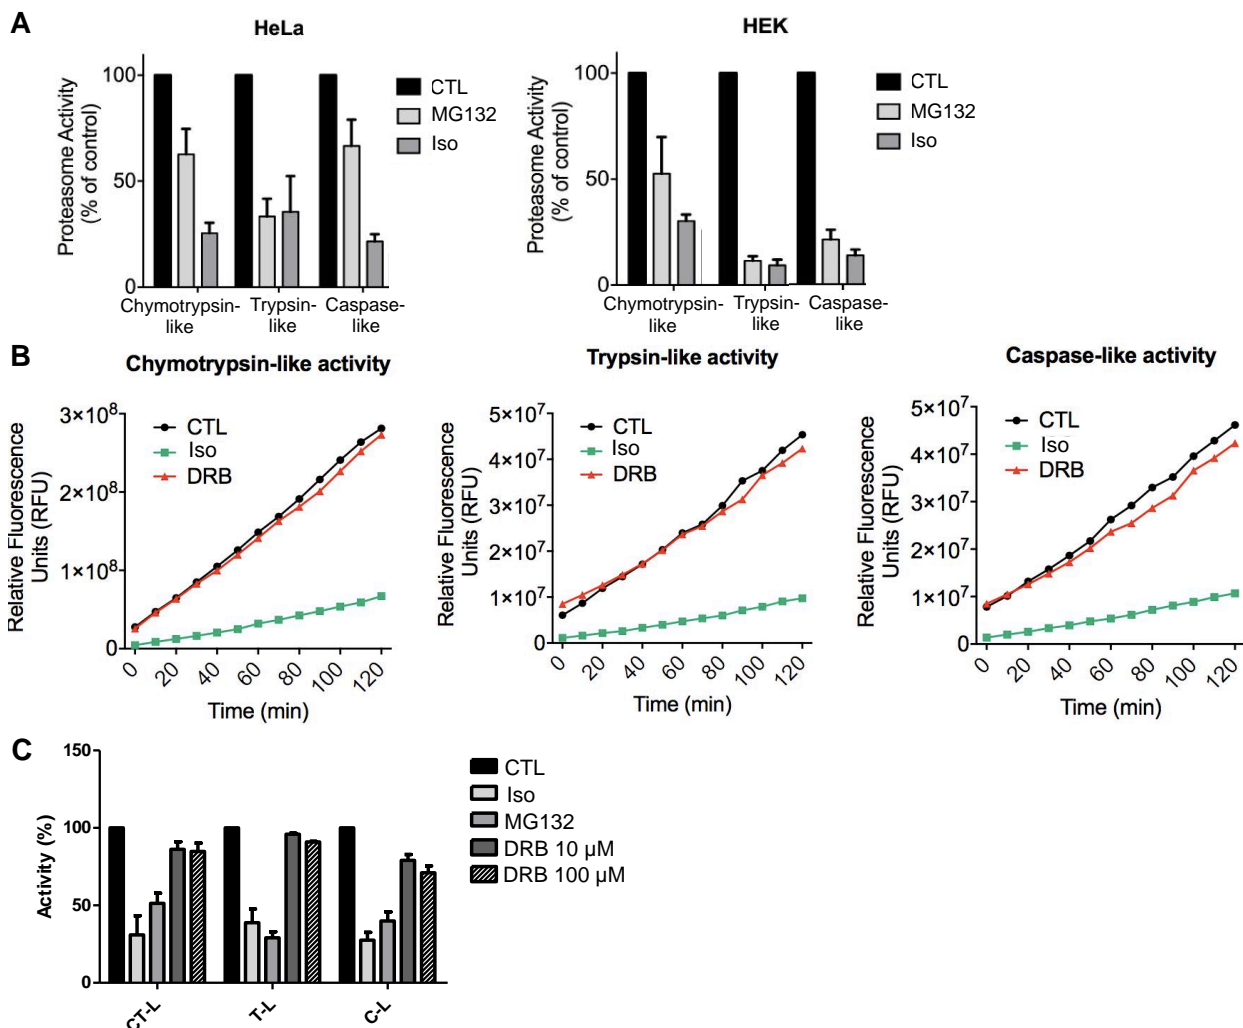

**Figure S5: Isoginkgetin inhibits the proteolytic activities of the 20S proteasome and cancer cell lysates.** (A) Analysis of the proteasome activity in HEK or HeLa cell lysates, measured by cleavage of fluorogenic substrates of the chymotrypsin-, trypsin- and caspase-like enzymatic activity over a 2-h period upon treatment with 10  $\mu$ M isoginkgetin or 10  $\mu$ M MG132. Representative data of three independent experiments. (B) Activity of purified 20S proteasome measured by cleavage of fluorogenic substrates of the chymotrypsin-, trypsin- and caspase-like enzymatic activity over a 2-h period upon treatment with 10  $\mu$ M isoginkgetin or 10  $\mu$ M DRB (representative data from three independent experiments). (C) Proteasome activity measured by cleavage of fluorogenic substrates of the chymotrypsin- (CT-L), trypsin- (T-L), and caspase-like (C-L) enzymatic activity after 2 h in HeLa cells treated with 10  $\mu$ M isoginkgetin, 10  $\mu$ M MG132, 10  $\mu$ M DRB, or 100  $\mu$ M DRB (representative data from three independent experiments).

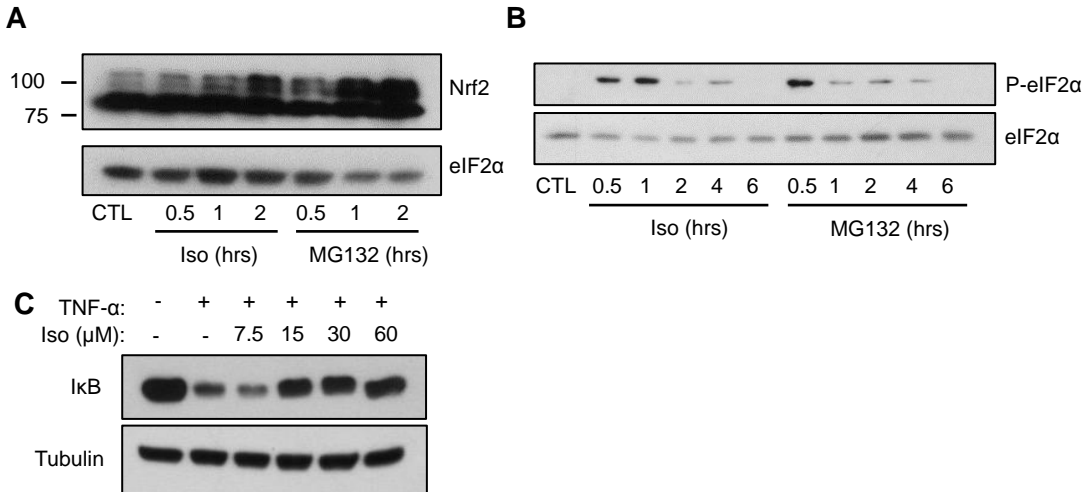

**Figure S6. Isoginkgetin treatment leads to an accumulation of proteasomal targets.** (A-B) Western blot analysis of the expression levels of Nrf2, eIF2 $\alpha$ , and phospho-eIF2 $\alpha$  in HeLa cells treated with isoginkgetin or MG132 for the indicated time periods. (C) Western blot analysis of I $\kappa$ B protein levels in HeLa cells pre-treated with the indicated doses of isoginkgetin for 6 h followed by a 30 min TNF $\alpha$  stimulation, compared to tubulin loading control.
